# Supplementary material for: Human Health Risk Assessment of the Photocatalytic Oxidation of BTEX over TiO2/Volcanic Glass
Source: MDPI journal article supplement (doi:10.3390/molecules28248119), 2023-12-15
Supplement: s1 [file s1]

## Supporting Information

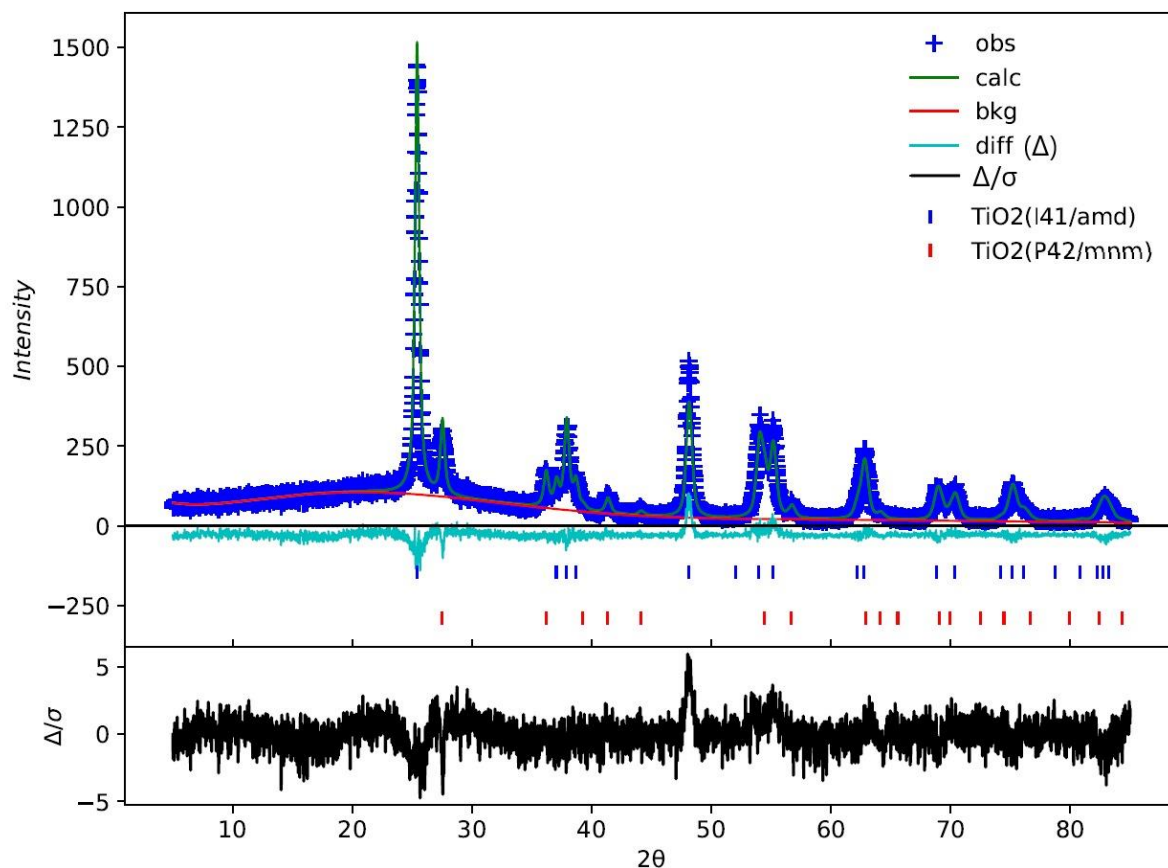

**Figure S1.** Observed (blue line) and calculated (green line) X-ray diffraction patterns and their difference profile (turquoise line:  $I_o - I_c$ ) for the X-ray diffraction pattern of TiO<sub>2</sub> using the Le Bail method by GSAS-II program. The lowest curve (black line) shows the difference between the observed and calculated powder diffraction patterns divided by standard deviation  $\sigma(I_o)$  of observed pattern plotted against  $2\theta$ .

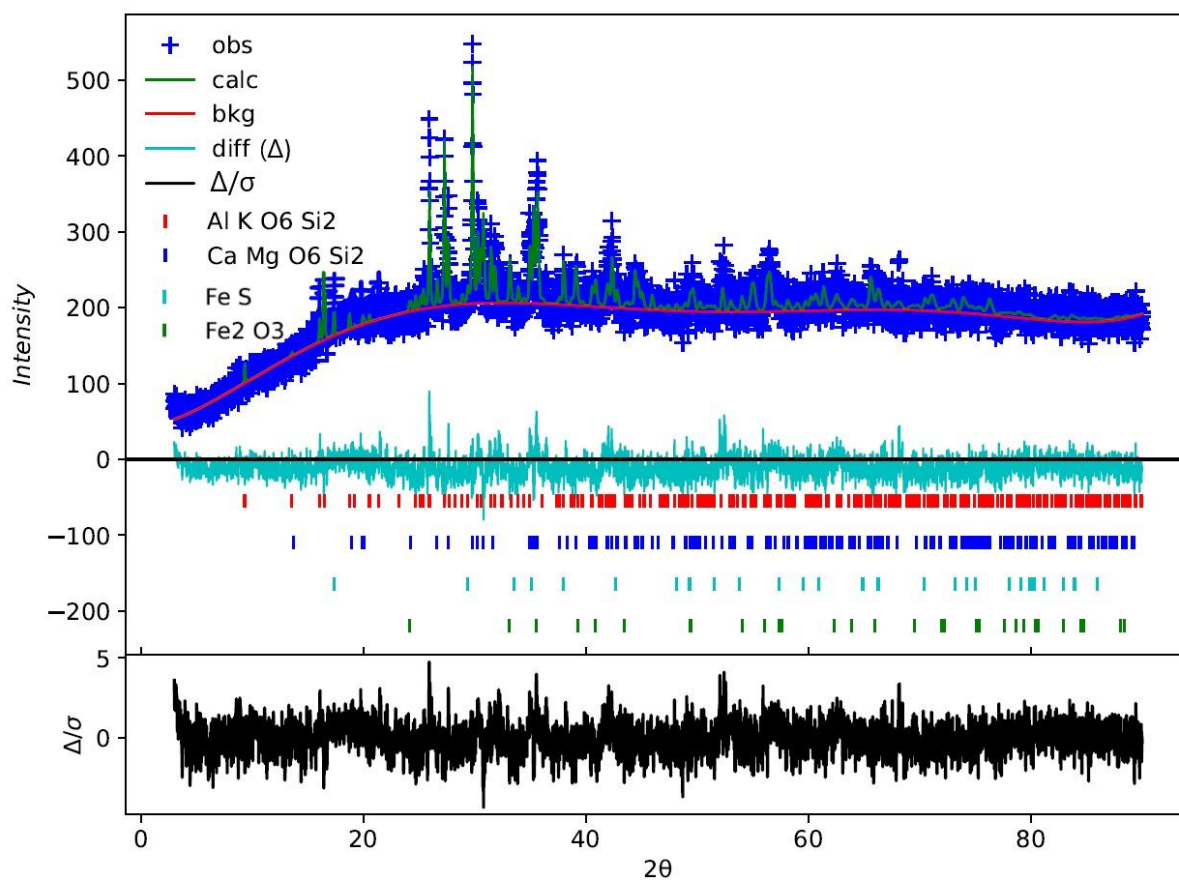

**Figure S2.** Observed (blue line) and calculated (green line) X-ray diffraction patterns and their difference profile (turquoise line:  $I_o - I_c$ ) for the X-ray diffraction pattern of volcanic glass using the Le Bail method by GSAS-II program. The lowest curve (black line) shows the difference between the observed and calculated powder diffraction patterns divided by standard deviation  $\sigma(I_o)$  of observed pattern plotted against  $2\theta$ .

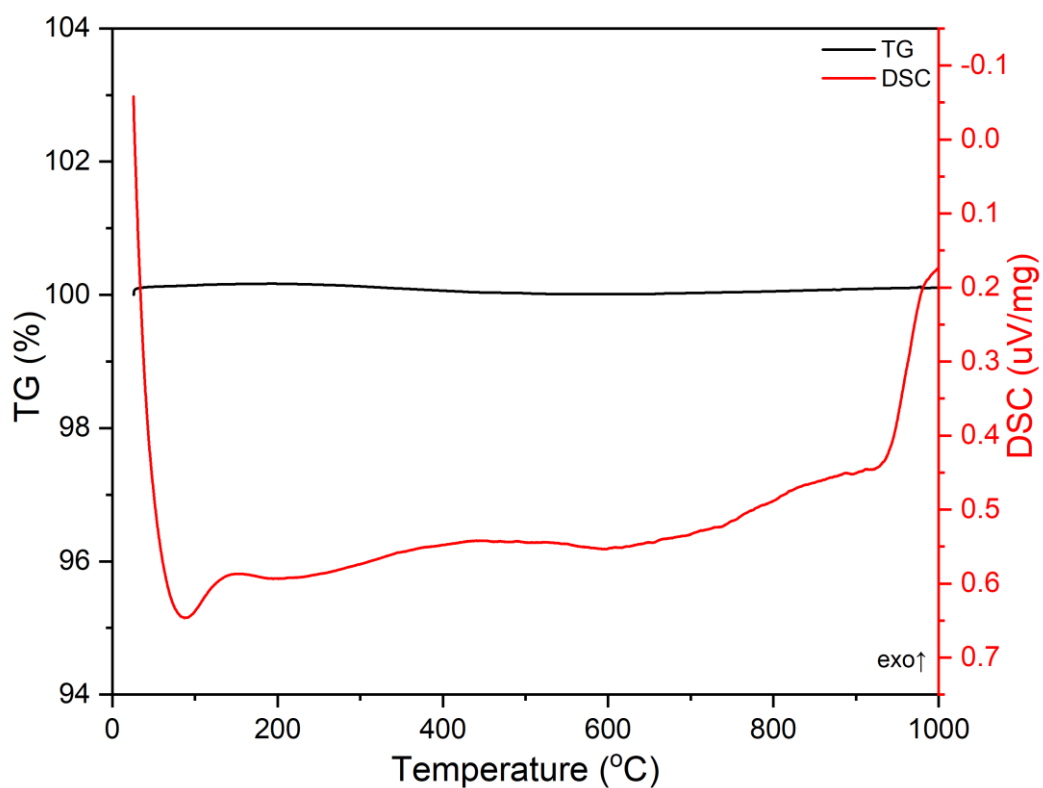

**Figure S3.** TG/DSC curves for volcanic glass sample measured in dry nitrogen using a thermoanalyzer (NETZSCH 449F3A–0372–M) over the temperature range of 20– 1000 °C. The parameters during measurements were as follows: crucible of DSC/TG pan Al<sub>2</sub>O<sub>3</sub>; heating rate 10 K min<sup>–1</sup>

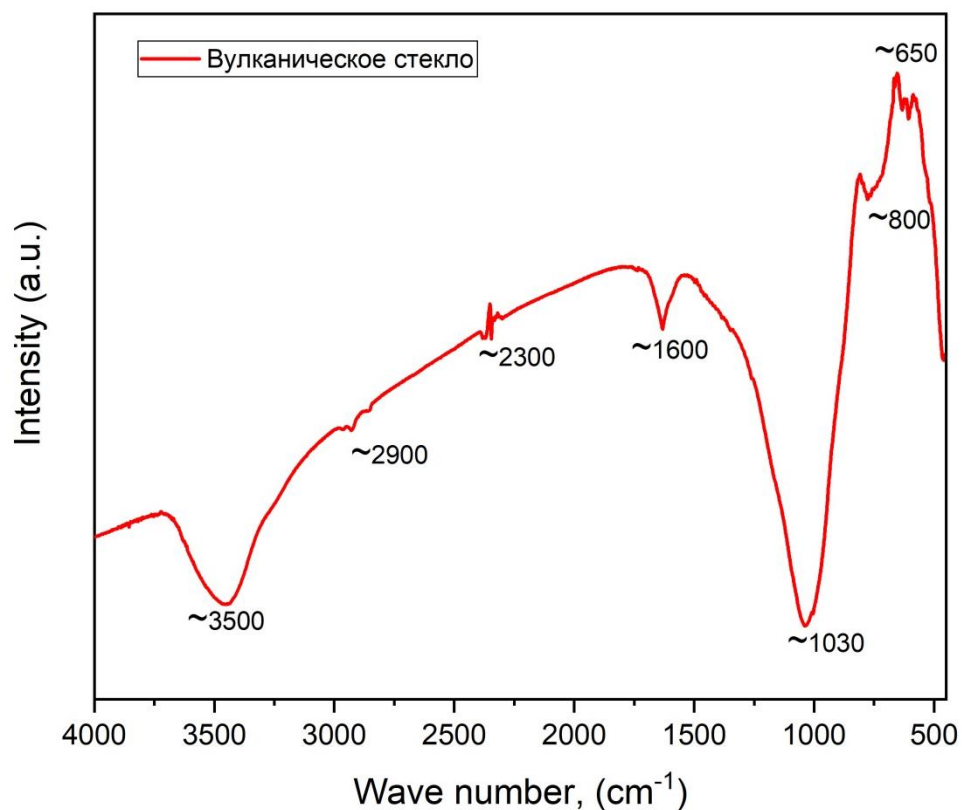

**Figure S4.** An IR spectrum was conducted for a sample of volcanic glass substrate, encompassing wavenumber values ranging from 450 to 4000 cm<sup>-1</sup>. Through factor group analysis of the vibrations associated with Si–O–Si and Al–O–Si bonds within the glass sample, the IR spectrum reveals several significant features. These include a principal absorption peak at 1035 cm<sup>-1</sup>, a relatively strong peak at approximately 1600 cm<sup>-1</sup>, and a weaker peak around 800 cm<sup>-1</sup>. Additionally, there are minor peaks observed at approximately 650 cm<sup>-1</sup>, 2300 cm<sup>-1</sup>, and 2900 cm<sup>-1</sup>.

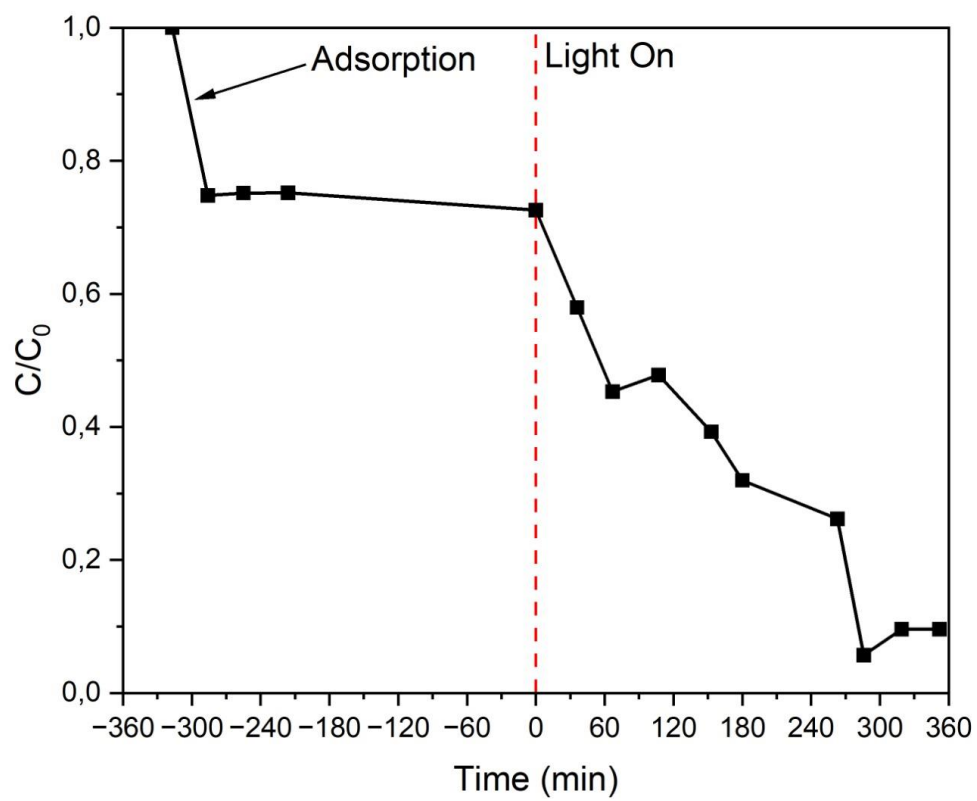

**Figure S5.** Evolution of the toluene concentration with time under recirculation over  $\text{TiO}_2$  /volcanic glass

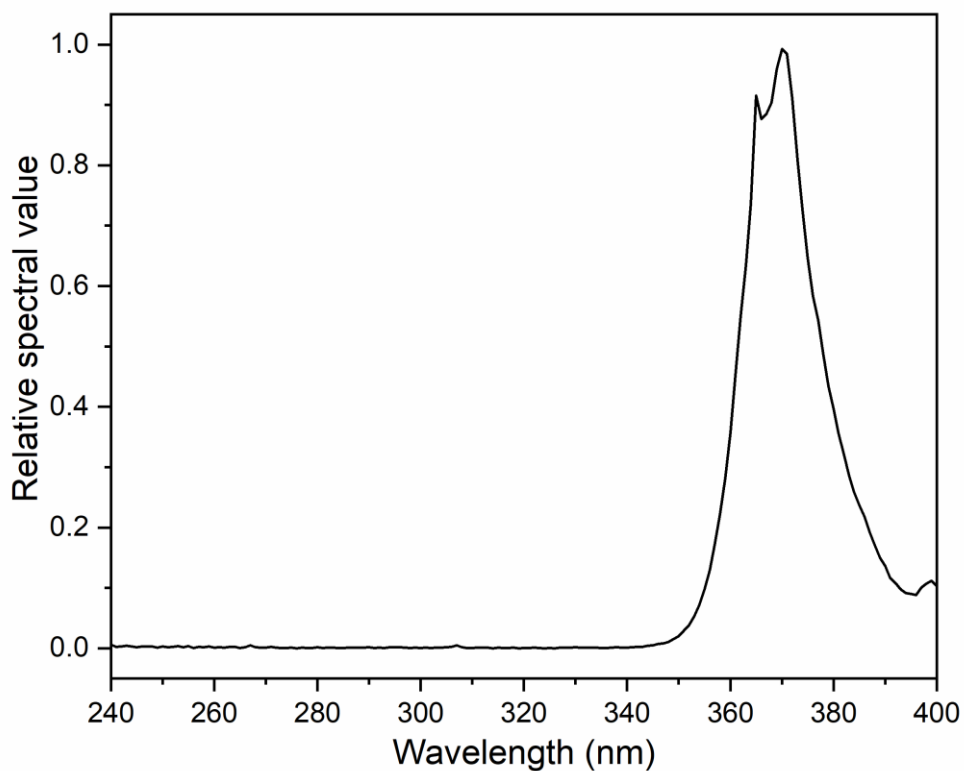

**Figure S6. Emission spectrum of the 36W fluorescent tube (Philips-PL-L-36W/10/4)**

with a spectral peak centered on 371 nm. The lamp emits with an irradiance:

| Items                                  | value     | Items                                  | value     | Items                                             | value     |
|----------------------------------------|-----------|----------------------------------------|-----------|---------------------------------------------------|-----------|
| Eu <sub>vb</sub> (mW/cm <sup>2</sup> ) | 3.3117E-2 | Eu <sub>vc</sub> (mW/cm <sup>2</sup> ) | 6.3672E-2 | Eu <sub>va</sub> (mW/cm <sup>2</sup> )            | 1.5051E1  |
| L <sub>p</sub> (nm)                    | 370.8     | HW(nm)                                 | 16.2      | E <sub>e</sub> (240.0~300.0)(mW/cm <sup>2</sup> ) | 8.0666E-2 |
